# Supplementary material for: Whole Genome Amplification and De novo Assembly of Single Bacterial Cells
Source: PLOS journal article supplement (doi:10.1371/journal.pone.0006864), 2009-09-01
Supplement: S3 (10.1371/journal.pone.0006864.s003) [file journal.pone.0006864.s003]

Supplementary Table 2. Genome sequencing and coverage statistics for two single-cell genomes and an un-amplified culture of *Prochlorococcus* MED4.

The 454-Illumina hybrid data include all 454-FLX, Illumina (35nt), and Illumina (71nt) reads.

|                                   | Un-amplified Culture | SAG A | SAG B  |
|-----------------------------------|----------------------|-------|--------|
| <b><u>Roche 454-FLX</u></b>       |                      |       |        |
| Sequencing effort (X)             | 40.0                 | 38.5  | 42.8   |
| Median coverage (X)               | 38.2                 | 8.60  | 7.50   |
| % genome recovered $\geq 1X$      | 99.9                 | 97.6  | 74.7   |
| # of gaps                         | 5                    | 546   | 569    |
| Largest gap (bp)                  | 720                  | 1,271 | 23,992 |
| Median gap length (bp)            | 180                  | 40    | 196    |
| <b><u>Illumina (35nt)</u></b>     |                      |       |        |
| Sequencing effort (X)             | 52.0                 | 228   | 194    |
| Median coverage (X)               | 52.0                 | 39.5  | 37.4   |
| % genome recovered $\geq 1X$      | 99.9                 | 96.0  | 86.5   |
| # of gaps                         | 2                    | 1472  | 2,443  |
| Largest gap (bp)                  | 4                    | 1433  | 10,209 |
| Median gap length (bp)            | 3                    | 19    | 24     |
| <b><u>454-Illumina Hybrid</u></b> |                      |       |        |
| Sequencing effort (X)             | 92.0                 | 1,353 | 667    |
| Median coverage (X)               | 92.3                 | 274   | 125    |
| % genome recovered $\geq 1X$      | 99.9                 | 99.6  | 91.1   |
| # of gaps                         | 1                    | 210   | 1,152  |
| Largest gap (bp)                  | 3                    | 324   | 5,290  |
| Median gap length (bp)            | 3                    | 18    | 31     |
